# Supplementary material for: Risk Factors for Perineal Wound Breakdown in Early Postpartum: A Retrospective Case–Control Study
Source: MDPI journal article supplement (doi:10.3390/jcm12083036), 2023-04-21

**Supplementary File S1 :** The directed acyclic graph (DAG) for the study.

The shaded variables were the most frequently found among the authors.

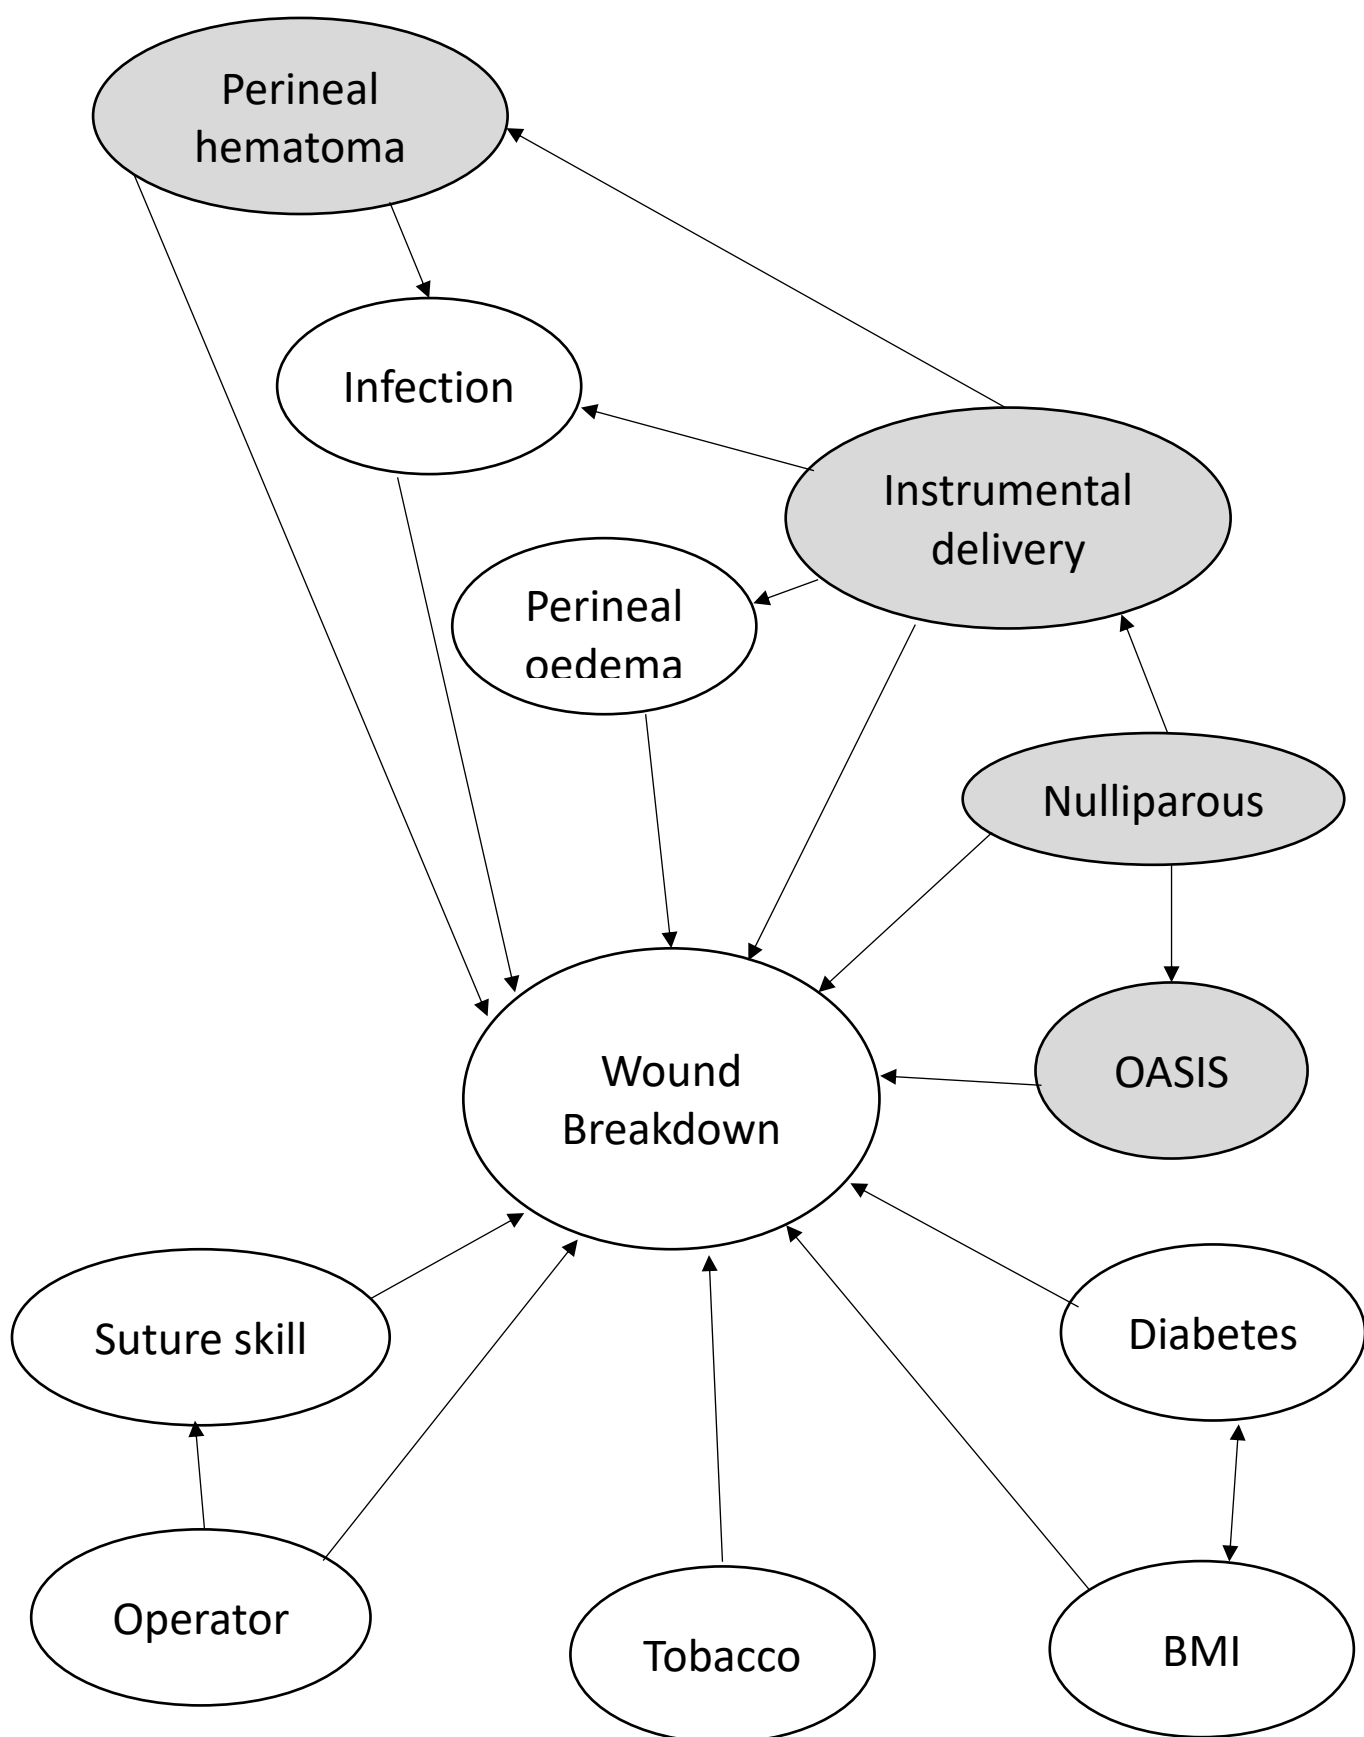

Supplement: s1 [file s1]
